# Supplementary material for: Transmission of Grapevine Leafroll-Associated Viruses and Grapevine Virus A by Vineyard-Sampled Soft Scales (Parthenolecanium corni, Hemiptera: Coccidae)
Source: MDPI journal article supplement (doi:10.3390/v14122679), 2022-11-29
Supplement: s1 [file s1]

**Table S1.** Comparison between virus contents in leaves from canes of the same source grapevine and their respective *Parthenolecanium corni* L1 nymphs (50 LI per batch) before a set of transmission experiments, and in leaves from recipient grapevines one year after inoculation.

| Source vine |       |      | Viruses detected in              |              |              |                 |
|-------------|-------|------|----------------------------------|--------------|--------------|-----------------|
|             |       |      | Viruses detected in source vines |              | L1 nymphs    | Recipient vines |
| row         | stock | twig | using ELISA                      | using RT-PCR | using RT-PCR | using ELISA     |
| 4           | 7     | 1    |                                  | GLRaV 1, GVA | GLRaV 1, GVA | GLRaV 1, GVA    |
| 4           | 7     | 2    | GLRaV 1                          | GLRaV 1, GVA | GLRaV 1, GVA | GLRaV 1, GVA    |
| 4           | 7     | 3    | and GVA                          | GLRaV 1, GVA | GLRaV 1, GVA | dead            |
| 7           | 2     | 1    |                                  | GLRaV 1, GVA | GLRaV 1, GVA | GLRaV 1, GVA    |
| 7           | 2     | 2    | GLRaV 1                          | GLRaV 1, GVA | GLRaV 1, GVA | GLRaV 1, GVA    |
| 7           | 2     | 3    | and GVA                          | GLRaV 1, GVA | GLRaV 1, GVA | dead            |
| 7           | 2     | 4    |                                  | GLRaV 1, GVA | GLRaV 1, GVA | GLRaV 1, GVA    |
| 5           | 4     | 1,1  |                                  | GLRaV 1, GVA | GLRaV 1, GVA | negative        |
| 5           | 4     | 1,2  | GLRaV 1                          | GLRaV 1, GVA | GLRaV 1, GVA | GLRaV 1, GVA    |
| 5           | 4     | 2    | and GVA                          | GLRaV 1, GVA | GLRaV 1, GVA | negative        |
| 5           | 4     | 3    |                                  | GLRaV 1, GVA | GLRaV 1, GVA | negative        |
| 6           | 2     | 1    |                                  | GLRaV 1, GVA | GLRaV 1, GVA | negative        |
| 6           | 2     | 2    | GLRaV 1                          | GLRaV 1, GVA | GLRaV 1      | GLRaV 1, GVA    |
| 6           | 2     | 3    | and GVA                          | GLRaV 1, GVA | GLRaV 1      | negative        |
| 5           | 58    | 1    | GLRaV 1                          | GLRaV 1, 3   | GLRaV 1, 3   | negative        |
| 5           | 58    | 2    | and 3                            | GLRaV 1, 3   | GLRaV 1, 3   | GLRaV 1         |
| 5           | 72    | 1    | GLRaV 1                          | GLRaV 1      | negative     | negative        |
| 5           | 72    | 2    | and 3                            | GLRaV 1      | negative     | GLRaV 1         |
| 6           | 35    | 1    |                                  | GLRaV 1      | GLRaV 1      | negative        |
| 6           | 35    | 2    | GLRaV 1                          | GLRaV 1      | GLRaV 1      | negative        |
| 6           | 35    | 3    |                                  | GLRaV 1      | GLRaV 1      | GLRaV 1         |
| 6           | 36    | 1    | GLRaV 1                          | GLRaV 1      | GLRaV 1      | negative        |
| 6           | 36    | 2    |                                  | GLRaV 1      | GLRaV 1      | negative        |
| 8           | 4     | 1    | negative                         | GLRaV 1      | GLRaV 1      | GLRaV 1         |
| 8           | 4     | 2    |                                  | GLRaV 1      | GLRaV 1      | dead            |
| 6           | 50    | 1    | negative                         | negative     | negative     | negative        |
| 6           | 50    | 2    | control                          | negative     | negative     | negative        |
